# Supplementary material for: Ternary Ag/BiOBr/rGO nanoflower composite as a high-efficiency photocatalyst for formaldehyde and rhodamine B degradation
Source: Royal Society of Chemistry journal article supplement (doi:10.1039/d3nj01672b), 2023-01-01
Supplement: d3nj01672b1.pdf [file d3nj01672b1.pdf]

Supporting Information

**Ternary Ag/BiOBr/rGO nanoflower composite as  
a highly efficient photocatalyst for Rhodamine B and formaldehyde degradation**

Gang Yan<sup>a,\*</sup>, Lijun Zhou<sup>a</sup>, Baolin Yang<sup>a</sup>, Hongliang Hu<sup>a</sup>, Xiangwei Guo<sup>b</sup>,

Hongkai Zhao<sup>a</sup>

*a. College of Material Science and Engineering, Jilin Jianzhu University, Changchun  
130118, China*

*b. Anyang Normal University, College of Chemistry and Chemical Engineering,  
455000 Anyang P. R. China*

E-mail: yang431@nenu.edu.cn;

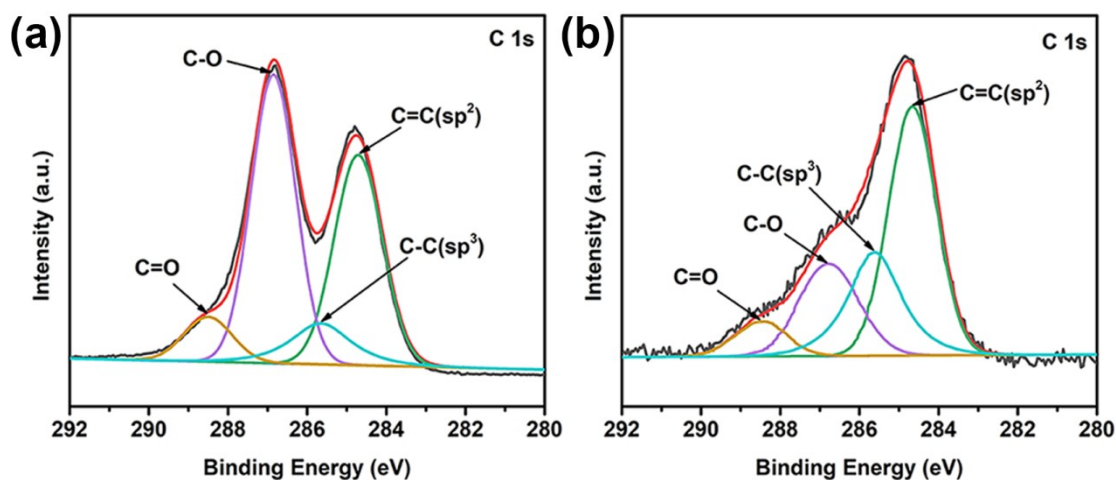

Fig. S1. (a) XPS spectra of GO, (b) XPS spectra of Ag/BiOBr/rGO-4.

Table S1. The C 1s peak position and the relative atomic percentage of various functional groups in GO and Ag/BiOBr/rGO-4

| Fitting of the C 1s peak Binding energy [eV] (relative atomic percentage [%]) |             |             |             |            |
|-------------------------------------------------------------------------------|-------------|-------------|-------------|------------|
|                                                                               | $C=C(sp^2)$ | $C-C(sp^3)$ | $C-O$       | $C=O$      |
| GO                                                                            | 284.6(36.4) | 285.6( 9.7) | 286.8(46.1) | 288.5(7.8) |
| Ag/BiOBr/rGO-4                                                                | 284.6(46.1) | 285.6(23.8) | 286.7(22.9) | 288.4(7.2) |

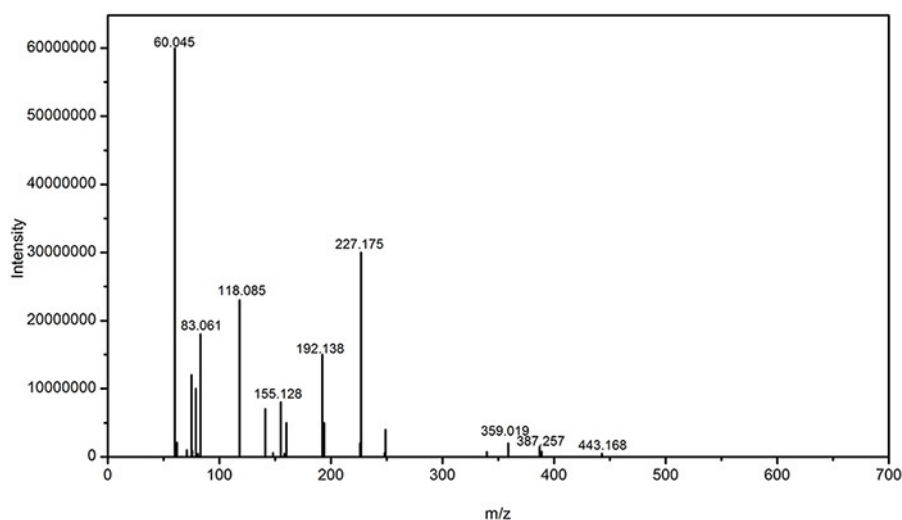

Fig. S2. Chromatograms monitored in HPLC/MS corresponding to solutions of RhB.

The intermediate species and degradation pathway of RhB was tested by HPLC/MS. C18 column, UV detector ( $\lambda = 227\text{nm}$ ), and acetonitrile/water (60/40, v/v) was used as a mobile phase at a flow rate of 1.0 mL/min.
